# Supplementary material for: Efficient Removal of Nonylphenol Isomers from Water by Use of Organo-Hydrotalcites
Source: MDPI journal article supplement (doi:10.3390/ijerph19127214), 2022-06-12

## SUPPLEMENTARY INFORMATION

### Efficient removal of nonylphenol isomers from water by use of organo-hydrotalcites

Daniel Cosano\*, Dolores Esquivel, Francisco J. Romero-Salguero, César Jiménez-Sanchidrián and José Rafael Ruiz\*

*Departamento de Química Orgánica, Instituto Universitario de Investigación en Química Fina y Nanoquímica IUIQFN, Facultad de Ciencias, Universidad de Córdoba, Campus de Rabanales, Edificio Marie Curie, E-14071 Córdoba, Spain*

\*Corresponding authors. E-mail address: [q92cohid@uco.es](mailto:q92cohid@uco.es) (D. Cosano); [qo1ruarj@uco.es](mailto:qo1ruarj@uco.es) (J.R. Ruiz), Tel.: 34 957218638; Fax: 34 957212066.

**Figure S1.** Kinetic models for 15 ppm concentration: a) Pseudo-first-order kinetic model, b) Pseudo-second-order kinetic model, c) Elovich kinetic model, d) and Interparticle diffusion kinetic model.

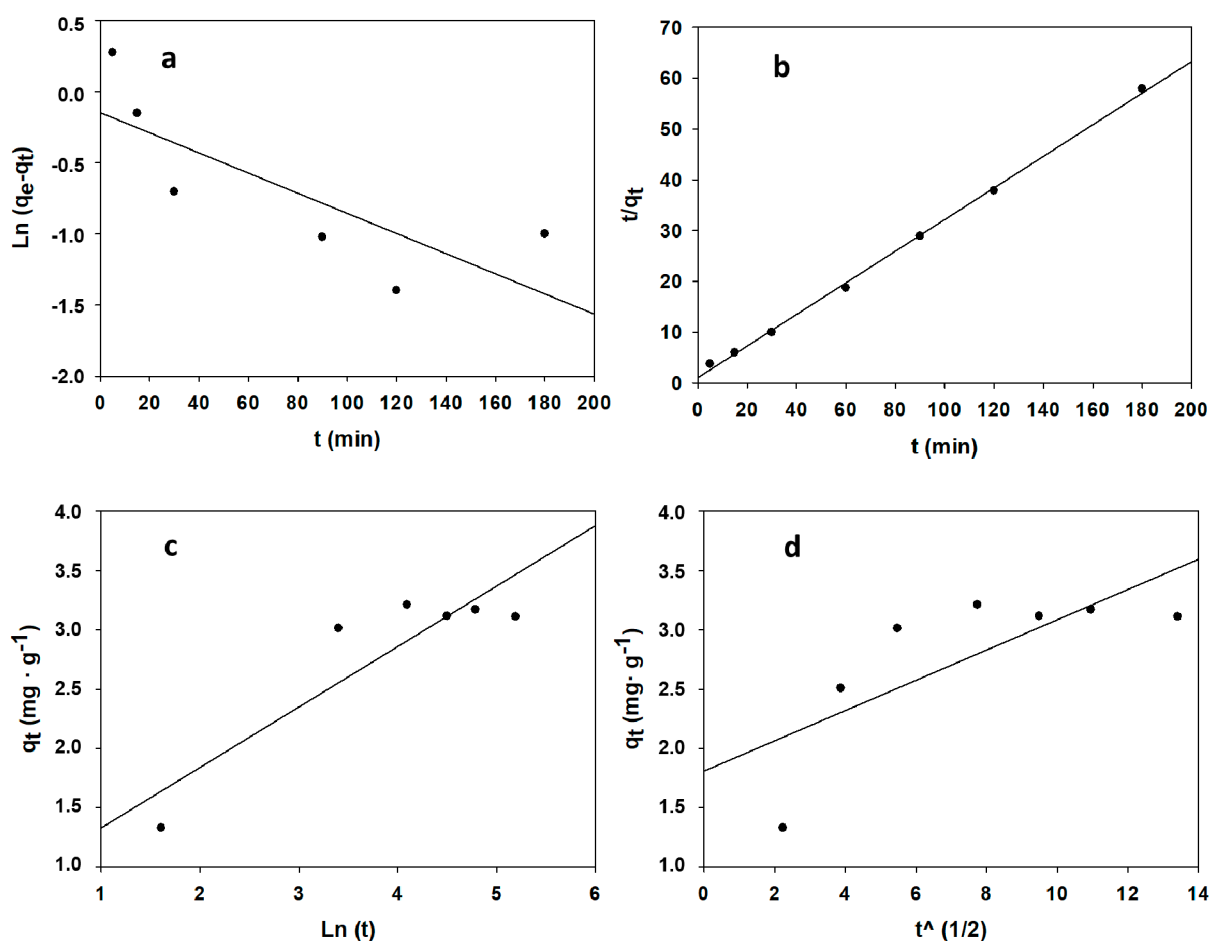

**Figure S2.** Kinetic models for 25 ppm concentration: a) Pseudo-first-order kinetic model, b) Pseudo-second-order kinetic model, c) Elovich kinetic model, d) and Interparticle diffusion kinetic model.

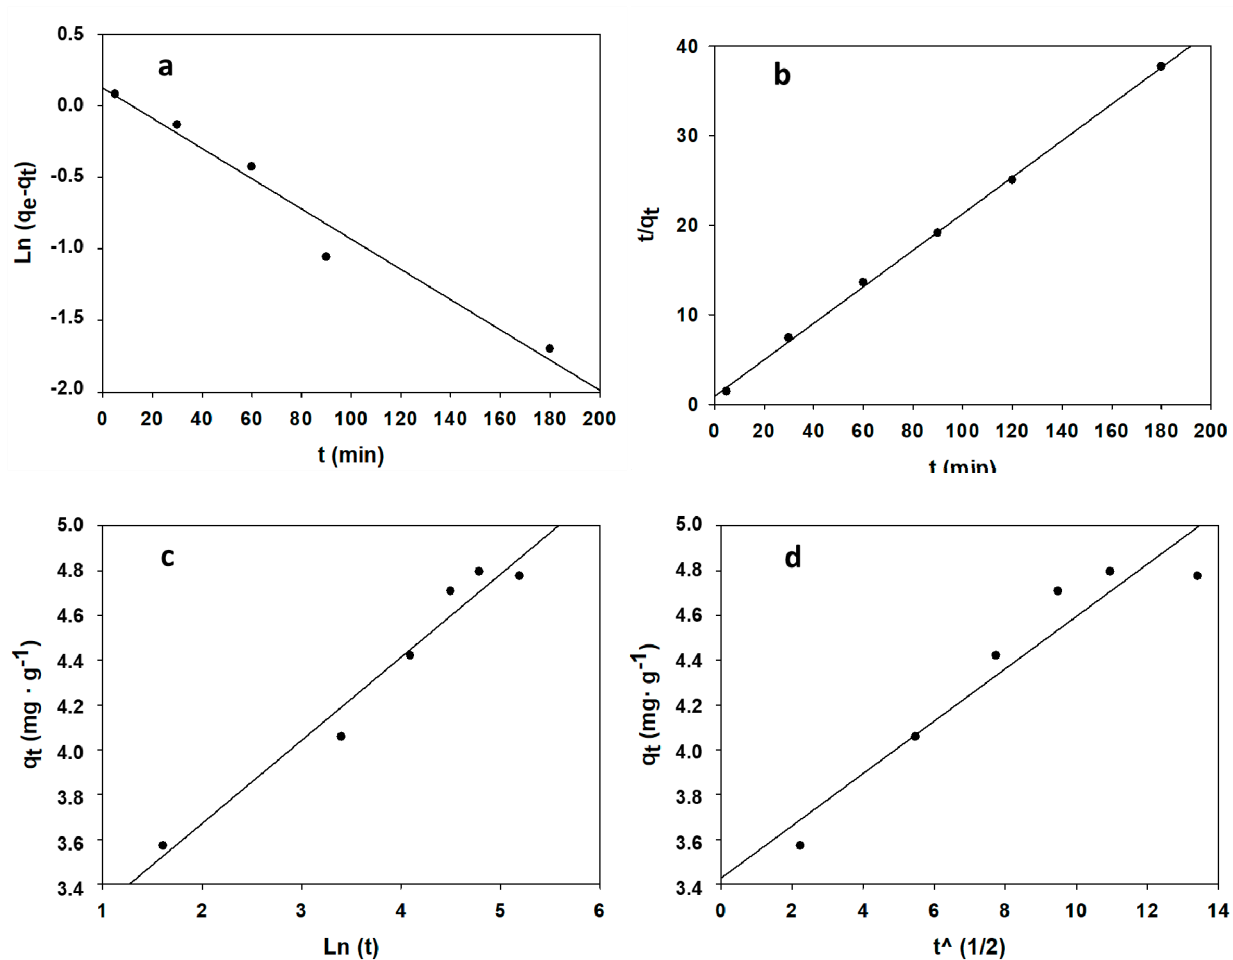

**Figure S3.** Kinetic models for 30 ppm concentration: a) Pseudo-first-order kinetic model, b) Pseudo-second-order kinetic model, c) Elovich kinetic model, d) and Interparticle diffusion kinetic model.

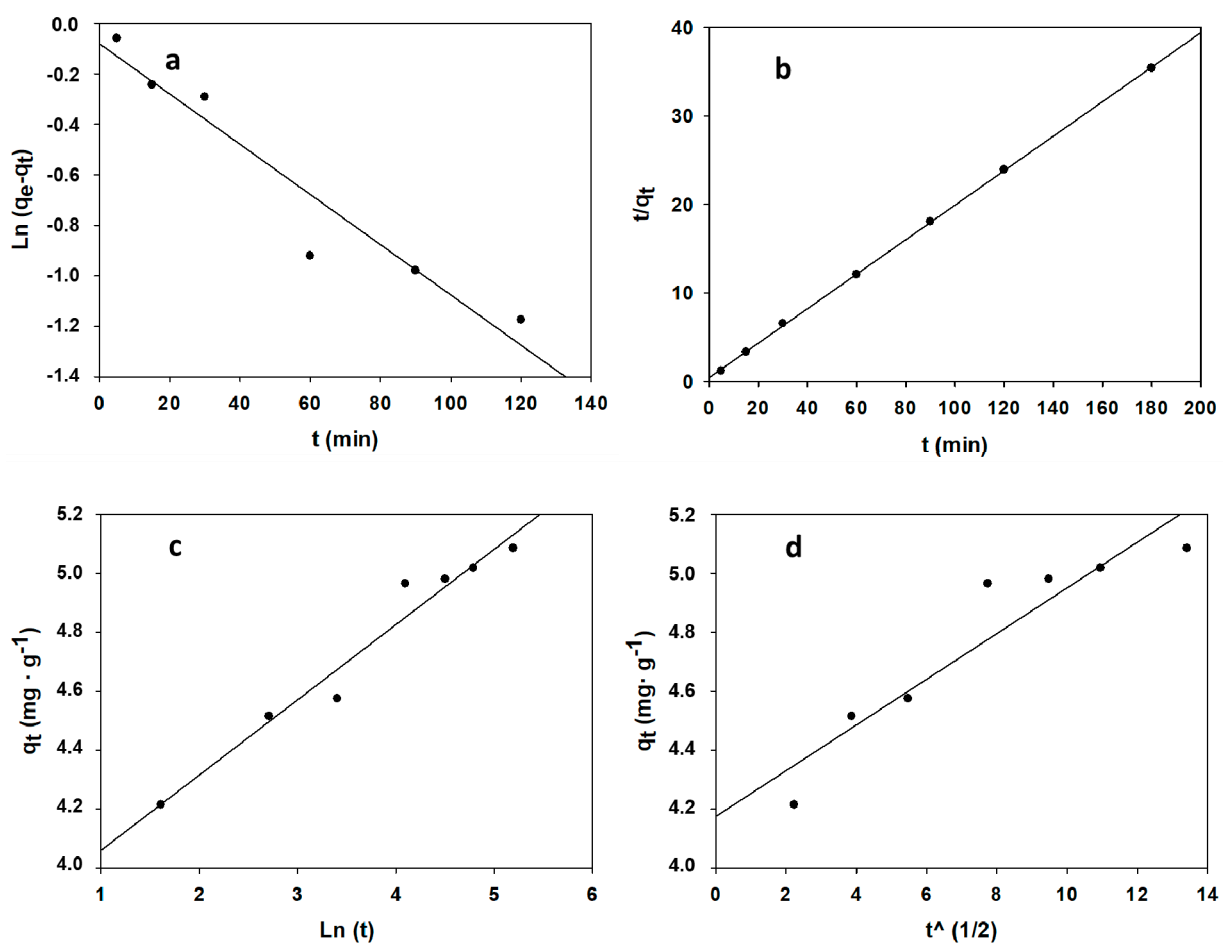

Supplement: s1 [file s1]
